# Supplementary material
Source: PubMed Central journal article supplement (PMC7057142)
Supplement: NIHMS1534889-supplement-1.pdf [file NIHMS1534889-supplement-1.pdf]

## **SUPPLEMENTAL MATERIALS**

**Supplemental Table 1: Catalog numbers for MSD assays**

**Supplemental Figure 1: Hazard ratio for CXCL10 and DFS by treatment arm**

**Supplemental Figure 2: Assessment of log-linearity for relationship between IP-10 and recurrence risk**

**Supplemental Table 2: Median changes in cytokines at weeks 4 and 6**

**Supplemental Table 3: Relationship between on-treatment cytokine levels and DFS**

**Supplemental Table 4: Subset analysis for cytokine changes among patients who did not recur**

**Supplemental Table 5: Evaluation for interaction effects between treatment arm and the association between baseline CXCL10 and DFS**

### Supplemental Table 1: MSD assays used for cytokine measurement

| <b>Cytokine(s)</b>         | <b>MSD Catalog Number</b> |
|----------------------------|---------------------------|
| IL8, CXCL9, CXCL10, CXCL11 | N75CA (custom multiplex)  |
| VEGF, sFlt1, PlGF, bFGF    | N75CA (custom multiplex)  |
| sVEGFR-2                   | K151BOC                   |
| Ang2                       | N45ZA                     |
| IFN $\gamma$               | K151AEC                   |
| HGF                        | K15029C                   |

**Supplemental Figure 1: Hazard ratio for CXCL10 and DFS by treatment arm**

Plot of predicted hazard ratio from a Cox model including interaction between CXCL10 and treatment arm. There was no significant difference seen in the CXCL10 effect on DFS between treatment arms.

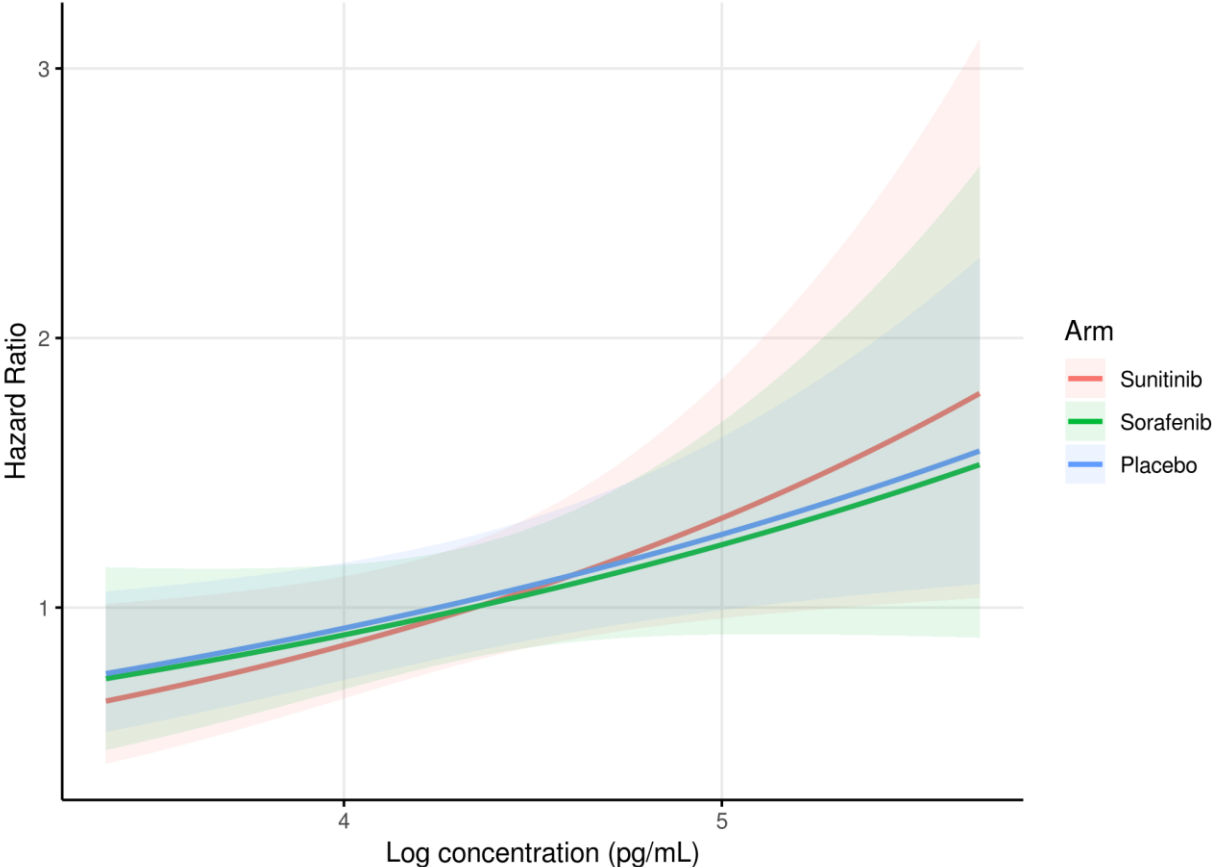

**Supplemental Figure 2: Assessment of log-linearity for relationship between IP-10 and recurrence risk**

Predicted HR over the range of IP-10 values for both the linear model and a model using a restricted cubic spline with 4 knots.

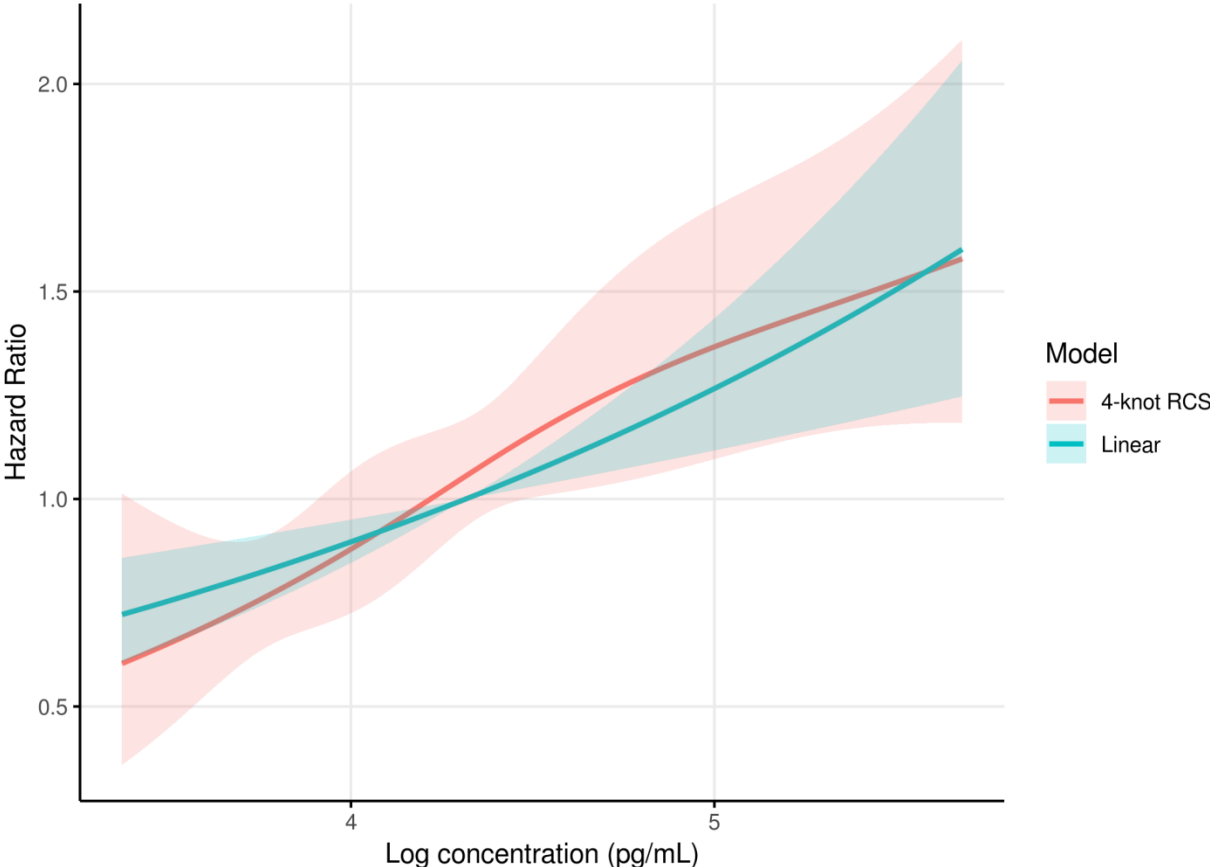

**Supplemental Table 2: Median changes in cytokines at weeks 4 and 6**

Raw median and range values for changes in each cytokine at weeks 4 and 6 are presented.

| <b>Molecule</b> | <b>Arm</b> | <b>Post-tx time point</b> | <b>Median fold change</b> | <b>Range</b>   |
|-----------------|------------|---------------------------|---------------------------|----------------|
| Ang2            | Sunitinib  | Week 4                    | 0.79                      | (0.21, 4.95)   |
|                 |            | Week 6                    | 1.03                      | (0.35, 2.85)   |
|                 | Sorafenib  | Week 4                    | 1.16                      | (0.00, 5.06)   |
|                 |            | Week 6                    | 1.10                      | (0.18, 2.96)   |
|                 | Placebo    | Week 4                    | 1.06                      | (0.37, 3.41)   |
|                 |            | Week 6                    | 1.01                      | (0.27, 4.03)   |
| bFGF            | Sunitinib  | Week 4                    | 0.96                      | (0.14, 12.79)  |
|                 |            | Week 6                    | 1.29                      | (0.25, 8.65)   |
|                 | Sorafenib  | Week 4                    | 0.92                      | (0.08, 21.92)  |
|                 |            | Week 6                    | 0.98                      | (0.24, 9.43)   |
|                 | Placebo    | Week 4                    | 1.07                      | (0.10, 6.68)   |
|                 |            | Week 6                    | 0.81                      | (0.31, 4.64)   |
| HGF             | Sunitinib  | Week 4                    | 1.01                      | (0.22, 2.32)   |
|                 |            | Week 6                    | 1.00                      | (0.42, 10.08)  |
|                 | Sorafenib  | Week 4                    | 0.91                      | (0.25, 2.73)   |
|                 |            | Week 6                    | 0.96                      | (0.15, 2.84)   |
|                 | Placebo    | Week 4                    | 1.05                      | (0.26, 3.50)   |
|                 |            | Week 6                    | 1.00                      | (0.48, 3.56)   |
| IFN-g           | Sunitinib  | Week 4                    | 1.35                      | (0.00, 42.05)  |
|                 |            | Week 6                    | 1.09                      | (0.04, 62.09)  |
|                 | Sorafenib  | Week 4                    | 1.05                      | (0.01, 122.72) |
|                 |            | Week 6                    | 1.06                      | (0.05, 18.04)  |
|                 | Placebo    | Week 4                    | 1.04                      | (0.02, 435.42) |

|          |           |        |      |                |
|----------|-----------|--------|------|----------------|
|          |           | Week 6 | 0.96 | (0.01, 20.34)  |
| IL-8     | Sunitinib | Week 4 | 2.00 | (0.00, 335.22) |
|          |           | Week 6 | 0.56 | (0.00, 298.38) |
|          | Sorafenib | Week 4 | 1.46 | (0.00, 165.27) |
|          |           | Week 6 | 1.00 | (0.00, 38.47)  |
|          | Placebo   | Week 4 | 1.28 | (0.00, 452.42) |
|          |           | Week 6 | 0.91 | (0.01, 577.22) |
| CXCL10   | Sunitinib | Week 4 | 2.19 | (0.80, 40.31)  |
|          |           | Week 6 | 1.17 | (0.45, 4.42)   |
|          | Sorafenib | Week 4 | 1.62 | (0.25, 24.92)  |
|          |           | Week 6 | 1.14 | (0.32, 56.34)  |
|          | Placebo   | Week 4 | 1.10 | (0.48, 46.71)  |
|          |           | Week 6 | 1.02 | (0.09, 8.13)   |
| CXCL11   | Sunitinib | Week 4 | 1.18 | (0.44, 7.55)   |
|          |           | Week 6 | 1.07 | (0.32, 3.14)   |
|          | Sorafenib | Week 4 | 1.19 | (0.29, 13.20)  |
|          |           | Week 6 | 1.11 | (0.14, 4.24)   |
|          | Placebo   | Week 4 | 1.01 | (0.16, 5.68)   |
|          |           | Week 6 | 1.00 | (0.41, 4.92)   |
| sVEGFR-2 | Sunitinib | Week 4 | 0.64 | (0.29, 1.12)   |
|          |           | Week 6 | 0.77 | (0.27, 1.67)   |
|          | Sorafenib | Week 4 | 0.74 | (0.13, 1.35)   |
|          |           | Week 6 | 0.80 | (0.38, 1.33)   |
|          | Placebo   | Week 4 | 0.95 | (0.71, 1.41)   |
|          |           | Week 6 | 1.08 | (0.49, 1.67)   |
| MIG      | Sunitinib | Week 4 | 2.02 | (0.71, 33.46)  |

|        |           |        |      |               |
|--------|-----------|--------|------|---------------|
|        |           | Week 6 | 1.00 | (0.35, 6.22)  |
|        | Sorafenib | Week 4 | 1.24 | (0.28, 39.86) |
|        |           | Week 6 | 1.08 | (0.41, 26.94) |
|        | Placebo   | Week 4 | 0.98 | (0.12, 2.33)  |
|        |           | Week 6 | 0.90 | (0.40, 4.99)  |
| PIGF   | Sunitinib | Week 4 | 3.64 | (0.15, 32.49) |
|        |           | Week 6 | 1.08 | (0.34, 10.12) |
|        | Sorafenib | Week 4 | 1.86 | (0.49, 9.34)  |
|        |           | Week 6 | 1.53 | (0.61, 7.23)  |
|        | Placebo   | Week 4 | 0.93 | (0.19, 2.68)  |
|        |           | Week 6 | 0.98 | (0.21, 1.93)  |
| sFlt-1 | Sunitinib | Week 4 | 0.84 | (0.33, 2.19)  |
|        |           | Week 6 | 0.93 | (0.24, 3.31)  |
|        | Sorafenib | Week 4 | 0.90 | (0.27, 3.58)  |
|        |           | Week 6 | 0.77 | (0.13, 3.92)  |
|        | Placebo   | Week 4 | 1.07 | (0.33, 6.62)  |
|        |           | Week 6 | 0.95 | (0.27, 2.64)  |
| VEGF   | Sunitinib | Week 4 | 1.69 | (0.47, 8.68)  |
|        |           | Week 6 | 1.03 | (0.27, 3.43)  |
|        | Sorafenib | Week 4 | 1.20 | (0.30, 11.03) |
|        |           | Week 6 | 1.27 | (0.31, 6.98)  |
|        | Placebo   | Week 4 | 0.99 | (0.21, 3.54)  |
|        |           | Week 6 | 0.93 | (0.26, 1.79)  |

**Supplemental Table 3: Relationship between on-treatment cytokine levels and DFS**

Results are shown after adjusting for baseline levels in the mixed effects model. P-values are adjusted using the Bonferroni correction.

|              | HR   | 95% CI       | Adjusted p-value |
|--------------|------|--------------|------------------|
| Ang2         | 1.21 | (0.97, 1.50) | 1                |
| bFGF         | 1.13 | (0.94, 1.36) | 1                |
| HGF          | 1.47 | (1.13, 1.93) | 0.056            |
| IFN $\gamma$ | 0.96 | (0.83, 1.10) | 1                |
| IL8          | 1    | (0.93, 1.08) | 1                |
| CXCL10       | 1.05 | (0.89, 1.23) | 1                |
| CXCL11       | 1.11 | (0.89, 1.38) | 1                |
| sVEGFR-2     | 0.88 | (0.60, 1.29) | 1                |
| CXCL9        | 1.04 | (0.89, 1.21) | 1                |
| PlGF         | 1.13 | (0.92, 1.38) | 1                |
| sFlt1        | 1.12 | (0.80, 1.56) | 1                |
| VEGF         | 1.24 | (0.99, 1.56) | 0.73             |



**Supplemental Table 4: Subset analysis for cytokine changes among patients who did not recur**

Changes at week 4 and week 6 are presented for each cytokine and treatment arm among the subset of patients who did not have disease recurrence. A repeated measures model was used to estimate baseline and followup values for each cytokine, and to test for differences between baseline and post-treatment time points.

| <b>Molecule</b> | <b>Arm</b> | <b>Post-tx time point</b> | <b>Log change from baseline (pg/mL)</b> | <b>95% CI (Lower)</b> | <b>95% CI (Upper)</b> | <b>Bonferroni adjusted p</b> |
|-----------------|------------|---------------------------|-----------------------------------------|-----------------------|-----------------------|------------------------------|
| Ang2            | Sunitinib  | Week 4                    | -0.1021                                 | 0.1193                | -0.3234               | 1                            |
| Ang2            | Sorafenib  | Week 4                    | 0.00137                                 | 0.1959                | -0.1932               | 1                            |
| Ang2            | Placebo    | Week 4                    | 0.00226                                 | 0.1905                | -0.186                | 1                            |
|                 |            |                           | -                                       |                       |                       |                              |
| Ang2            | Sunitinib  | Week 6                    | 0.05743                                 | 0.03713               | -0.152                | 1                            |
| Ang2            | Sorafenib  | Week 6                    | 0.06227                                 | 0.1496                | -0.0251               | 1                            |
|                 |            |                           | -                                       |                       |                       |                              |
| Ang2            | Placebo    | Week 6                    | -0.1324                                 | 0.03754               | -0.2273               | 0.46                         |
| bFGF            | Sunitinib  | Week 4                    | -0.1206                                 | 0.07924               | -0.3205               | 1                            |
| bFGF            | Sorafenib  | Week 4                    | 0.00312                                 | 0.1756                | -0.1694               | 1                            |
| bFGF            | Placebo    | Week 4                    | -0.059                                  | 0.1109                | -0.2289               | 1                            |
| bFGF            | Sunitinib  | Week 6                    | 0.4021                                  | 0.5654                | 0.2388                | <0.001                       |
| bFGF            | Sorafenib  | Week 6                    | 0.2744                                  | 0.4275                | 0.1212                | 0.035                        |
| bFGF            | Placebo    | Week 6                    | -0.1113                                 | 0.05182               | -0.2745               | 1.000                        |
| CXCL10          | Sunitinib  | Week 4                    | 1.0961                                  | 1.2863                | 0.9058                | <0.001                       |
| CXCL10          | Sorafenib  | Week 4                    | 0.6165                                  | 0.776                 | 0.4571                | <0.001                       |
| CXCL10          | Placebo    | Week 4                    | 0.3001                                  | 0.4719                | 0.1283                | 0.048                        |
| CXCL10          | Sunitinib  | Week 6                    | 0.2627                                  | 0.3652                | 0.1602                | <0.001                       |
| CXCL10          | Sorafenib  | Week 6                    | 0.1808                                  | 0.2801                | 0.08152               | 0.028                        |
| CXCL10          | Placebo    | Week 6                    | 0.115                                   | 0.2188                | 0.01114               | 1.000                        |
|                 |            |                           | -                                       |                       |                       |                              |
| HGF             | Sunitinib  | Week 4                    | 0.0329                                  | 0.1178                | 0.05196               | 1.000                        |
|                 |            |                           | -                                       |                       |                       |                              |
| HGF             | Sorafenib  | Week 4                    | 0.05159                                 | 0.01991               | -0.1231               | 1.000                        |
|                 |            |                           | -                                       |                       |                       |                              |
| HGF             | Placebo    | Week 4                    | 0.00333                                 | 0.07335               | 0.08002               | 1.000                        |
|                 |            |                           | -                                       |                       |                       |                              |
| HGF             | Sunitinib  | Week 6                    | 0.05532                                 | 0.1257                | 0.01504               | 1.000                        |
|                 |            |                           | -                                       |                       |                       |                              |
| HGF             | Sorafenib  | Week 6                    | 0.08723                                 | 0.01913               | -0.1553               | 0.878                        |
| HGF             | Placebo    | Week 6                    | 0.0023                                  | 0.07351               | -0.0689               | 1.000                        |
|                 |            |                           | -                                       |                       |                       |                              |
| IFNg            | Sunitinib  | Week 4                    | 0.02463                                 | 0.4547                | -0.5039               | 1.000                        |

|      |           |        |         |         |         |        |
|------|-----------|--------|---------|---------|---------|--------|
| IFNg | Sorafenib | Week 4 | 0.114   | 0.5086  | -0.2806 | 1.000  |
|      |           |        | -       |         |         |        |
| IFNg | Placebo   | Week 4 | 0.00623 | 0.4033  | -0.4158 | 1.000  |
| IFNg | Sunitinib | Week 6 | 0.3268  | 0.6088  | 0.04488 | 1.000  |
| IFNg | Sorafenib | Week 6 | -0.1638 | 0.1245  | -0.4521 | 1.000  |
|      |           |        | -       |         |         |        |
| IFNg | Placebo   | Week 6 | 0.03261 | 0.2612  | -0.3264 | 1.000  |
| IL8  | Sunitinib | Week 4 | 0.3463  | 0.8265  | -0.134  | 1.000  |
|      |           |        | -       |         |         |        |
| IL8  | Sorafenib | Week 4 | 0.3518  | 0.7695  | 0.06603 | 1.000  |
| IL8  | Placebo   | Week 4 | 1.0729  | 1.5069  | 0.639   | <0.001 |
| IL8  | Sunitinib | Week 6 | -0.1045 | 0.2944  | -0.5034 | 1.000  |
| IL8  | Sorafenib | Week 6 | -0.8608 | -0.4657 | -1.2558 | 0.002  |
| IL8  | Placebo   | Week 6 | -0.1363 | 0.2672  | -0.5399 | 1.000  |
| ITAC | Sunitinib | Week 4 | 0.2965  | 0.4265  | 0.1664  | 0.001  |
| ITAC | Sorafenib | Week 4 | 0.2098  | 0.3189  | 0.1007  | 0.013  |
|      |           |        | -       |         |         |        |
| ITAC | Placebo   | Week 4 | 0.03401 | 0.08322 | -0.1512 | 1.000  |
| ITAC | Sunitinib | Week 6 | 0.1568  | 0.2509  | 0.06273 | 0.083  |
|      |           |        | -       |         |         |        |
| ITAC | Sorafenib | Week 6 | 0.05396 | 0.1447  | 0.03679 | 1.000  |
|      |           |        | -       |         |         |        |
| ITAC | Placebo   | Week 6 | 0.08153 | 0.1765  | 0.01345 | 1.000  |
| KDR  | Sunitinib | Week 4 | -0.4932 | -0.4418 | -0.5446 | <0.001 |
| KDR  | Sorafenib | Week 4 | -0.2877 | -0.2438 | -0.3315 | 0.000  |
|      |           |        | -       |         |         |        |
| KDR  | Placebo   | Week 4 | 0.02166 | 0.02171 | 0.06502 | 1.000  |
| KDR  | Sunitinib | Week 6 | -0.2478 | -0.1954 | -0.3002 | <0.001 |
| KDR  | Sorafenib | Week 6 | -0.2451 | -0.1964 | -0.2937 | <0.001 |
|      |           |        | -       |         |         |        |
| KDR  | Placebo   | Week 6 | 0.04411 | 0.00831 | 0.09654 | 1.000  |
| MIG  | Sunitinib | Week 4 | 1.045   | 1.22    | 0.8699  | <0.001 |
| MIG  | Sorafenib | Week 4 | 0.4507  | 0.5979  | 0.3036  | <0.001 |
|      |           |        | -       |         |         |        |
| MIG  | Placebo   | Week 4 | 0.02218 | 0.1362  | -0.1806 | 1.000  |
|      |           |        | -       |         |         |        |
| MIG  | Sunitinib | Week 6 | 0.04591 | 0.1453  | 0.05345 | 1.000  |
|      |           |        | -       |         |         |        |
| MIG  | Sorafenib | Week 6 | 0.08672 | 0.1829  | 0.00943 | 1.000  |
|      |           |        | -       |         |         |        |
| MIG  | Placebo   | Week 6 | 0.0551  | 0.1557  | 0.04547 | 1.000  |
| PIGF | Sunitinib | Week 4 | 1.3394  | 1.4653  | 1.2135  | <0.001 |
| PIGF | Sorafenib | Week 4 | 0.5816  | 0.691   | 0.4723  | <0.001 |
| PIGF | Placebo   | Week 4 | -0.1058 | 0.0001  | -0.2117 | 1.000  |
| PIGF | Sunitinib | Week 6 | 0.2142  | 0.315   | 0.1133  | 0.003  |

|       |           |        |         |         |         |        |
|-------|-----------|--------|---------|---------|---------|--------|
| PIGF  | Sorafenib | Week 6 | 0.5055  | 0.6003  | 0.4107  | <0.001 |
| PIGF  | Placebo   | Week 6 | -0.1596 | -0.0579 | -0.2614 | 0.158  |
| SFlt1 | Sunitinib | Week 4 | -0.2415 | -0.1625 | -0.3206 | 0.000  |
|       |           |        | -       |         |         |        |
| SFlt1 | Sorafenib | Week 4 | 0.04771 | 0.02108 | -0.1165 | 1.000  |
|       |           |        |         |         |         |        |
| SFlt1 | Placebo   | Week 4 | 0.02356 | 0.08986 | 0.04273 | 1.000  |
|       |           |        | -       |         |         |        |
| SFlt1 | Sunitinib | Week 6 | 0.03404 | 0.0293  | 0.09737 | 1.000  |
|       |           |        |         |         |         |        |
| SFlt1 | Sorafenib | Week 6 | -0.146  | 0.08593 | -0.206  | <0.001 |
|       |           |        | -       |         |         |        |
| SFlt1 | Placebo   | Week 6 | 0.04758 | 0.01631 | -0.1115 | 1.000  |
| VEGF  | Sunitinib | Week 4 | 0.6297  | 0.757   | 0.5023  | <0.001 |
| VEGF  | Sorafenib | Week 4 | 0.2543  | 0.3655  | 0.1431  | 0.001  |
|       |           |        |         |         |         |        |
| VEGF  | Placebo   | Week 4 | -0.1596 | 0.05232 | -0.2669 | 0.263  |
|       |           |        |         |         |         |        |
| VEGF  | Sunitinib | Week 6 | 0.03211 | 0.1452  | 0.08098 | 1.000  |
| VEGF  | Sorafenib | Week 6 | 0.2921  | 0.3974  | 0.1868  | <0.001 |
|       |           |        | -       |         |         |        |
| VEGF  | Placebo   | Week 6 | 0.01503 | 0.09872 | -0.1288 | 1.000  |

**Supplemental Table 5: Evaluation for interaction effects between treatment arm and the association between baseline CXCL10 and DFS**

We assessed for interaction terms between baseline CXCL10 and treatment arm. There were no statistically significant interactions in this setting.

|                     | <b>HR</b> | <b>95% CI</b> | <b>p-value</b> |
|---------------------|-----------|---------------|----------------|
| Baseline log CXCL10 | 1.37      | (1.07, 1.77)  | <b>0.013</b>   |
| Sunitinib           | 0.58      | (0.07, 4.53)  | 0.60           |
| Sorafenib           | 0.98      | (0.12, 7.92)  | 0.98           |
| CXCL10 : Sunitinib  | 1.13      | (0.71, 1.78)  | 0.61           |
| CXCL10 : Sorafenib  | 1.00      | (0.63, 1.59)  | 0.99           |
